# Supplementary material
Source: PubMed Central journal article supplement (PMC3977284)
Supplement: 1322360111_pnas.201322360SI.pdf [file 1322360111_pnas.201322360SI.pdf]

# Supporting Information

Carlyle et al. 10.1073/pnas.1322360111

## SI Materials and Methods

For quantitative immunoelectron microscopy, layers II–III of the monkey dorsolateral prefrontal cortex (dlPFC) were sampled for resectioning and analysis under a JEM1010 (Jeol) transmission electron microscope at 80 kV. Immunoreactive structures were digitally captured at 25,000–160,000 $\times$  magnification (Gatan). For profile identification, we adopted the criteria summarized in ref. 1.

Plastic blocks were examined using the 4th to the 20th surface-most sections (i.e., 160–800 nm; section thickness  $\approx$ 40 nm), to exclude penetration artifacts. Intense immunolabeling was found to a depth of 2  $\mu$ m, and was still detectable to a depth of at least 3  $\mu$ m from the tissue/plastic interface. Data for quantitative assessments were collected from random 46- $\mu$ m<sup>2</sup> fields of tau phosphorylated at serine 214 (pS214-tau) or phosphodiesterase 4A (PDE4A) immunoperoxidase-labeled material; counterstaining was omitted to facilitate detection.

A total of 1,200 pS214-tau-immunoreactive cellular profiles were counted in young dlPFC neuropil (six tissue blocks

from brains 9 y, 10 y, and 11 y; two blocks per brain) and, likewise, 1,200 profiles in aged dlPFC (brains 25 y, 26 y, and 29 y). pS214-Tau profiles were categorized as (i) axons, (ii) dendritic shafts, (iii) dendritic spines, and (iv) nondetermined, when safe ultrastructural criteria could not be used for profile identification. The prevalence of PDE4A in dendritic spines was assessed by counting immunoreactive spines within twenty 46- $\mu$ m<sup>2</sup> fields from five tissue blocks per brain, and counts were normalized to total number of spines in the same area. All eight brains (9–11 y, 24–26 y, 29 y, and 31 y) were used for mapping pS214-tau, PDE4A, and A-kinase anchor protein 6 (AKAP6) with immunoperoxidase or immunogold markers. Vesicular structures exhibiting pS214-tau immunoreactivity were traced in consecutive sections to identify the host cellular profile (i.e., axon, dendritic shaft, or spine) and to capture an association with the plasma membrane or a synaptic junction.

1. Peters A, Palay SL, Webster HdeF (1991) *The Fine Structure of the Nervous System: Neurons and Their Supporting Cells* (Oxford Univ Press, New York).





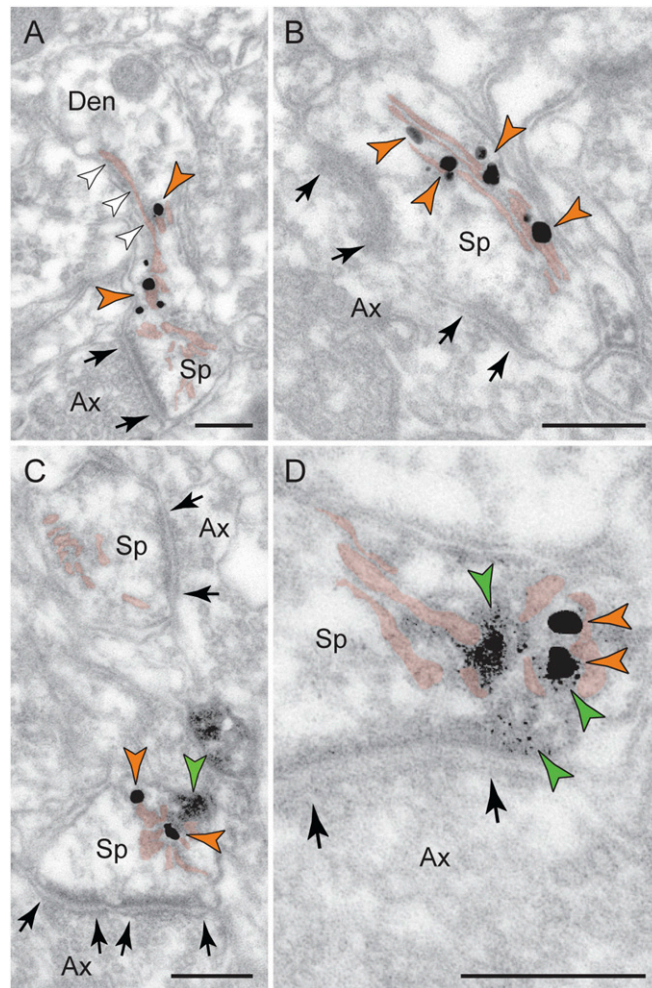

**Fig. S4.** AKAP6 localization and colocalization with PDE4A in young monkey dIPFC. PKA is tethered by anchoring proteins, including AKAP6. These images document AKAP6 on the spine apparatus (SA) (pseudocolored), the specialized smooth endoplasmic reticulum (SER) that buffers  $\text{Ca}^{2+}$  in the spine. Internal  $\text{Ca}^{2+}$  release is mediated via channels on the SA-limiting membrane, namely inositol trisphosphate receptors (IP3Rs) and ryanodine receptors (RyRs); in monkey dIPFC, IP3Rs are localized on SER cisterns, including the SA (1). cAMP-PKA signaling increases internal  $\text{Ca}^{2+}$  release by increasing the efficacy and expression of IP3Rs (2) and by increasing  $\text{Ca}^{2+}$  leak through RyRs (3). Increased  $\text{Ca}^{2+}$  can in turn promote cAMP production, fueling feedforward signaling (2). (A–D) AKAP6 is selectively localized (orange arrowheads) on the SA, the extension of the dendrite’s smooth reticulum into the spine; note in A the continuity with the SER of the parent dendrite (white arrowheads). Double immunoelectron microscopy (C and D) demonstrates AKAP6 (immunogold, orange arrowheads) colocalization with PDE4A (immunoperoxidase, green arrowheads) on the SA. Thus, PDE4A is positioned to regulate feedforward cAMP- $\text{Ca}^{2+}$  signaling in dIPFC spines. Arrows point to asymmetric axospinous synapses. Ax, axon; Den, dendrite; Sp, spine. (Scale bars: 200 nm.)

1. Paspalas CD, Goldman-Rakic PS (2004) Microdomains for dopamine volume neurotransmission in primate prefrontal cortex. *J Neurosci* 24(23):5292–5300.
2. Arnsten AF, Wang MJ, Paspalas CD (2012) Neuromodulation of thought: Flexibilities and vulnerabilities in prefrontal cortical network synapses. *Neuron* 76(1):223–239.
3. Liu X, et al. (2012) Role of leaky neuronal ryanodine receptors in stress-induced cognitive dysfunction. *Cell* 150(5):1055–1067.



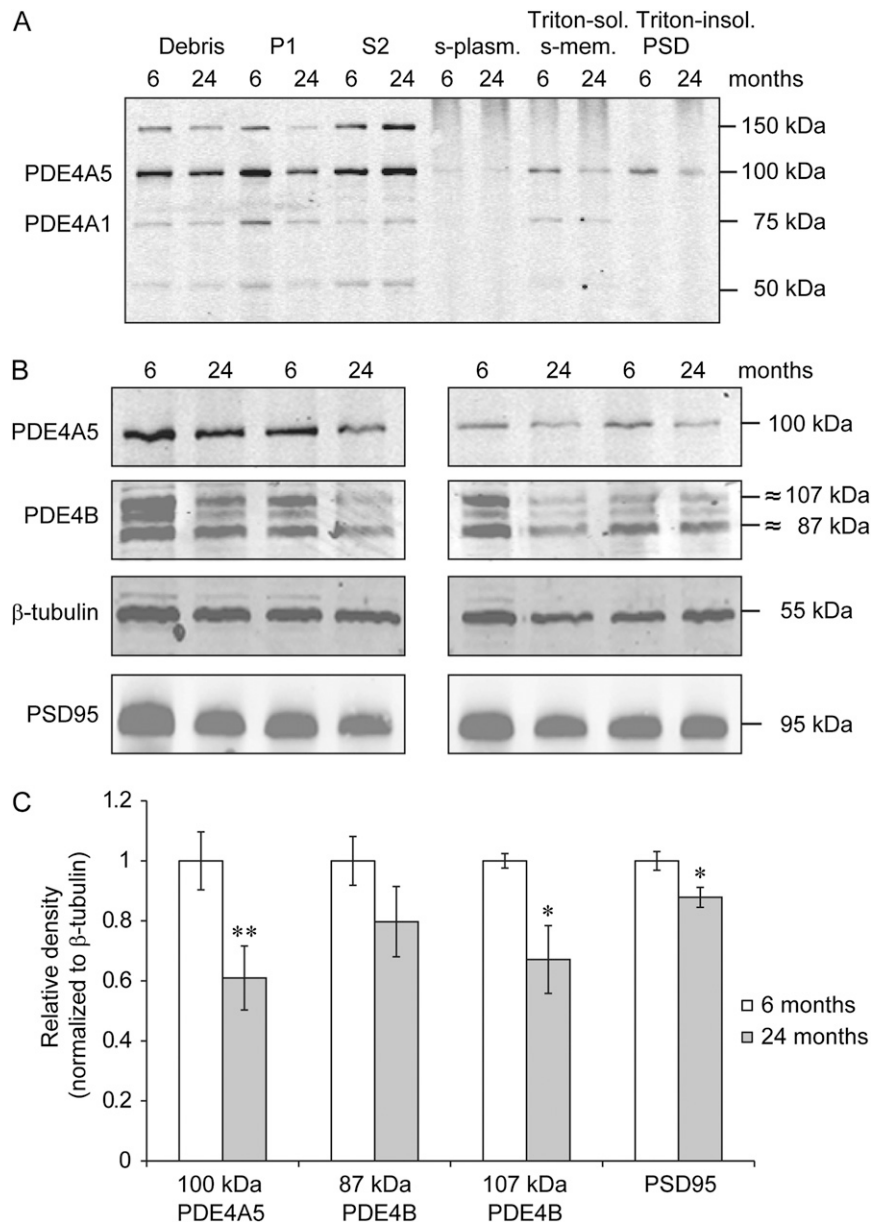

**Fig. S6.** Distribution of PDE4s through the mouse postsynaptic density (PSD) preparation. (A) Immunoblot showing the segregation of PDE4A isoforms throughout the stages of the PSD preparation process. The blot used one sample from a 6-mo-old and one sample from a 24-mo-old mouse. Only PDE4A5 is detectable in the Triton-insoluble PSD fraction. (B) Immunoblots showing the data quantified in Fig. 5C. Blots depict Triton-insoluble PSD fraction staining for PDE4A5 (Abcam; ab14607), PDE4B (1), β-tubulin (Sigma), and PSD95 (EMD Millipore). Each band represents tissue pooled from two animals of the same age:  $n = 4$  pools per age group. (C) PDE4A, PDE4B, and PSD95 bands were quantified and normalized to β-tubulin to control for protein loading. PDE4A and PDE4B bands were further normalized with regard to PSD95 intensity to account for observed PSD loss. \*\* $P < 0.05$ , remained significant ( $P < 0.05$ ) when also normalized by PSD95 levels. \* $P < 0.05$ , significance was lost after correction for PSD95 intensity. Error bars represent SEM.

1. Huston E, et al. (1997) Molecular cloning and transient expression in COS7 cells of a novel human PDE4B cAMP-specific phosphodiesterase, HSPDE4B3. *Biochem J* 328(Pt 2):549–558.

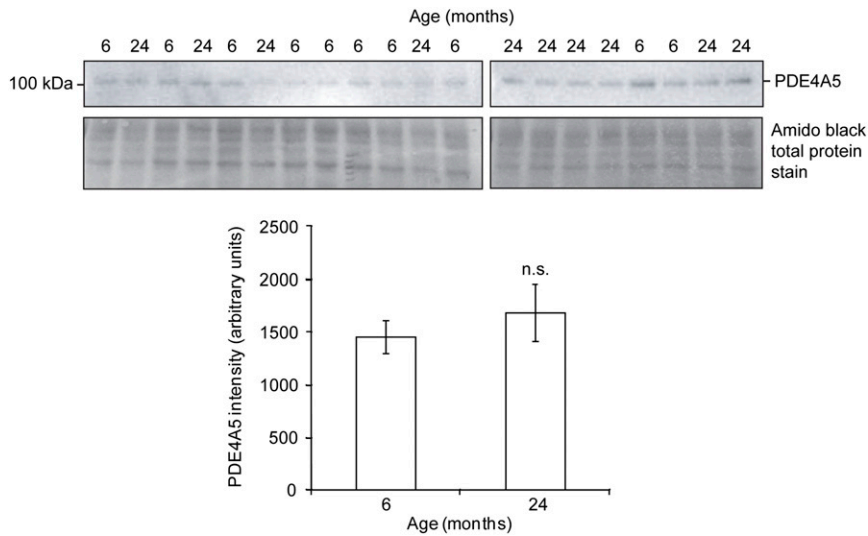

**Fig. S7.** PDE4A5 in total lysate from mouse PFC. Immunoblot was labeled for PDE4A (Abcam; ab14607) in 6-mo-old vs. 24-mo-old total tissue lysate from a punch of flash-frozen PFC. Note that the signal-to-noise ratio is low, reflecting the difficulty to discern PDE4A5 in total lysate from mouse brain. PDE4A5 band intensity was normalized by Amido black total protein stain (Sigma), and the quantification is shown in the graph. No significant effect of age on PDE4A5 expression was detected.

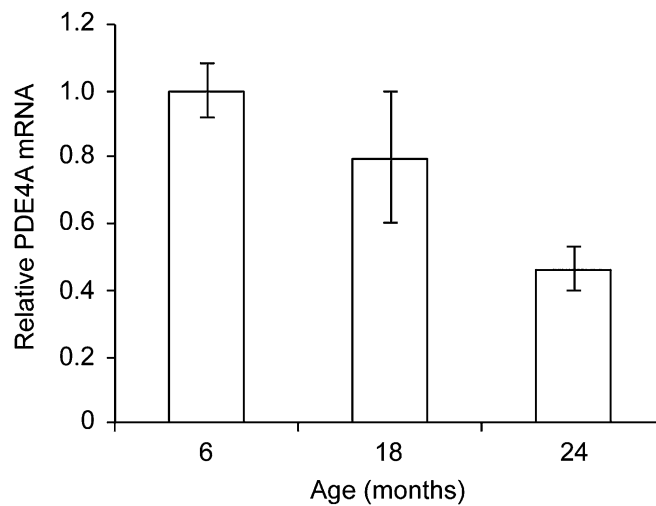

**Fig. S8.** qPCR using a pan-PDE4A probe shows a significant decrease in PDE4A mRNA with age in flash-frozen mouse PFC. Monotonic decrease in expression was found to be significant by one-way ANOVA;  $P < 0.02$  [ $F(2,18) = 5.185$ ]. Error bars represent SEM. Samples were normalized using probes for the reference genes TBP and RSP, which were found to be stable with increasing age. Forward pan-PDE4A probe, ACCACAACAGCCTGCACGCA; reverse pan-PDE4A probe, TGCCAGCTCCGAATTGGTGTG.
